# Supplementary material for: Nuclear localization of mitochondrial TCA cycle enzymes modulates pluripotency via histone acetylation
Source: Springer Nature journal article supplement (doi:10.1038/s41467-022-35199-0), 2022-12-02
Supplement: MOESM1 [file 41467_2022_35199_MOESM1_ESM.pdf]

# **Nuclear Localization of Mitochondrial TCA Cycle Enzymes**

## **Modulates Pluripotency via Histone Acetylation**

Wei Li, Qi Long, Hao Wu, Xingguo Liu et al.

### **Supplementary Information**

Supplementary Figure 1-10

Supplementary Table 1-7

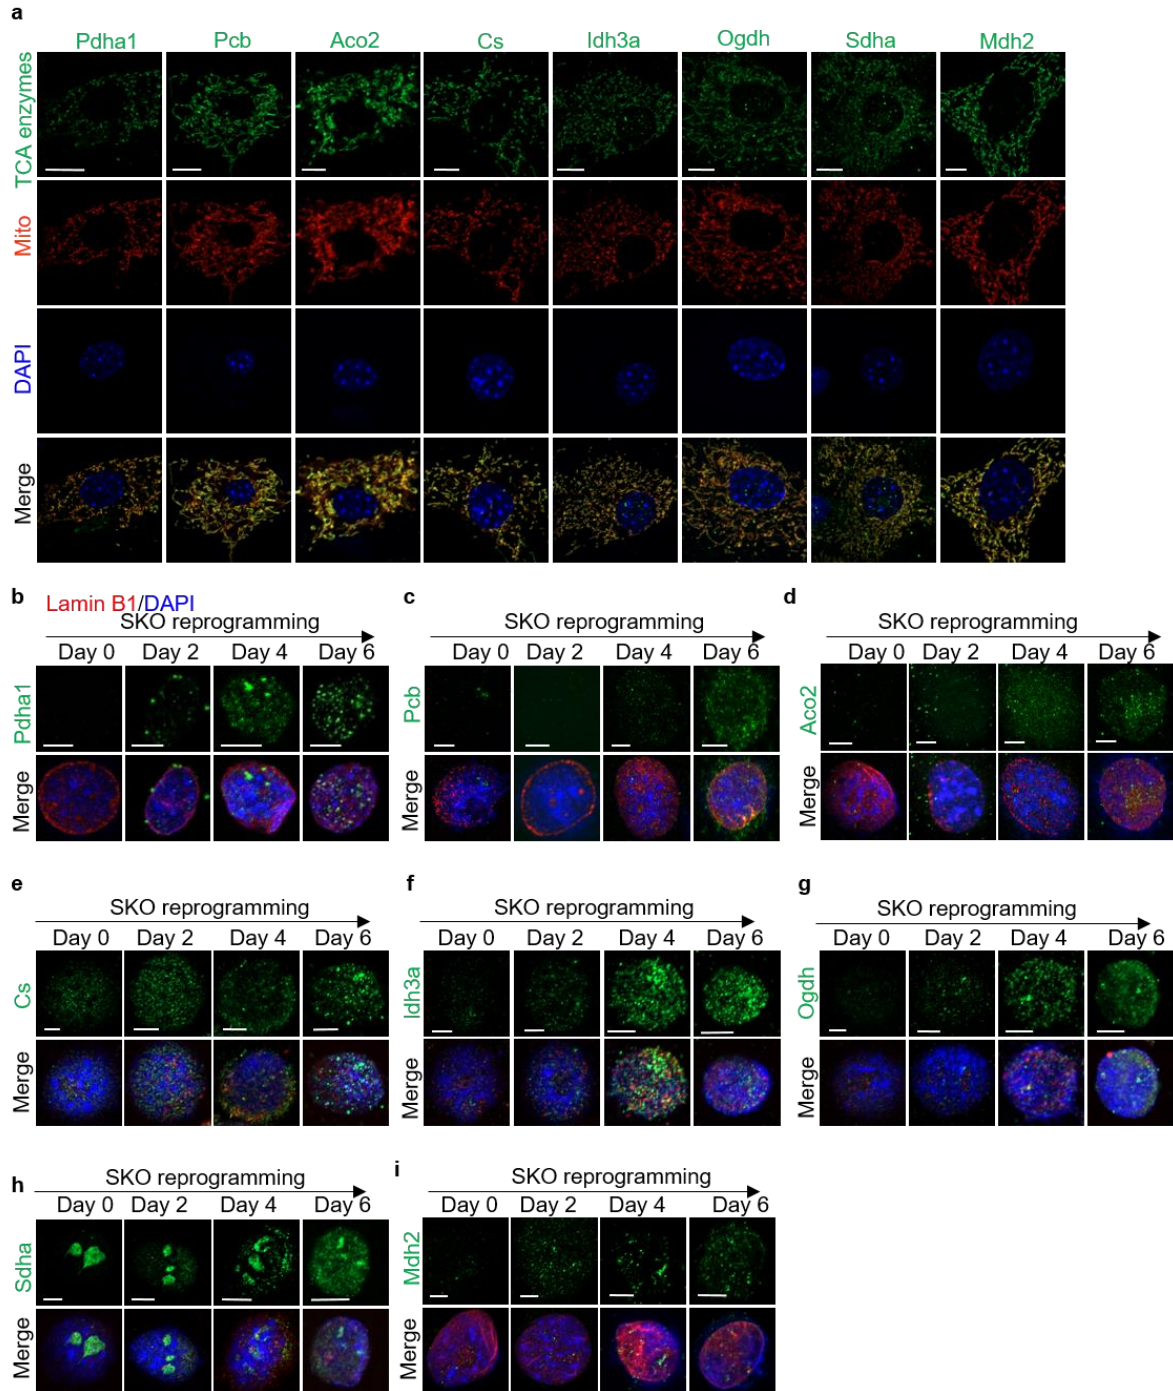

**Supplementary Figure 1. TCA Cycle Enzymes in Somatic Cells and Reprogramming Cells.** **a**, Pdha1, Pcb, Aco2, Cs, Idh3a, Ogdh, Sdha and Mdh2 (green) were stained with antibodies in MEFs. The mito-DsRed (Mito) was used as a marker of mitochondria. Scale bars, 5  $\mu$ m. **b-i**, The translocation of TCA cycle enzymes (purple) at the early stages of somatic cell reprogramming with SKO. The isolated nuclei of cells at day 0 to day 6 during reprogramming were stained with antibodies targeting Pdha1 (**b**), Pcb (**c**), Aco2 (**d**), Cs (**e**), Idh3a (**f**), Ogdh (**g**), Sdha (**h**) or Mdh2 (**i**) together with Lamin B1 (red) and DAPI (blue). Scale bars, 5  $\mu$ m. 3 independent experiments were repeated with similar results and one representative picture was presented.

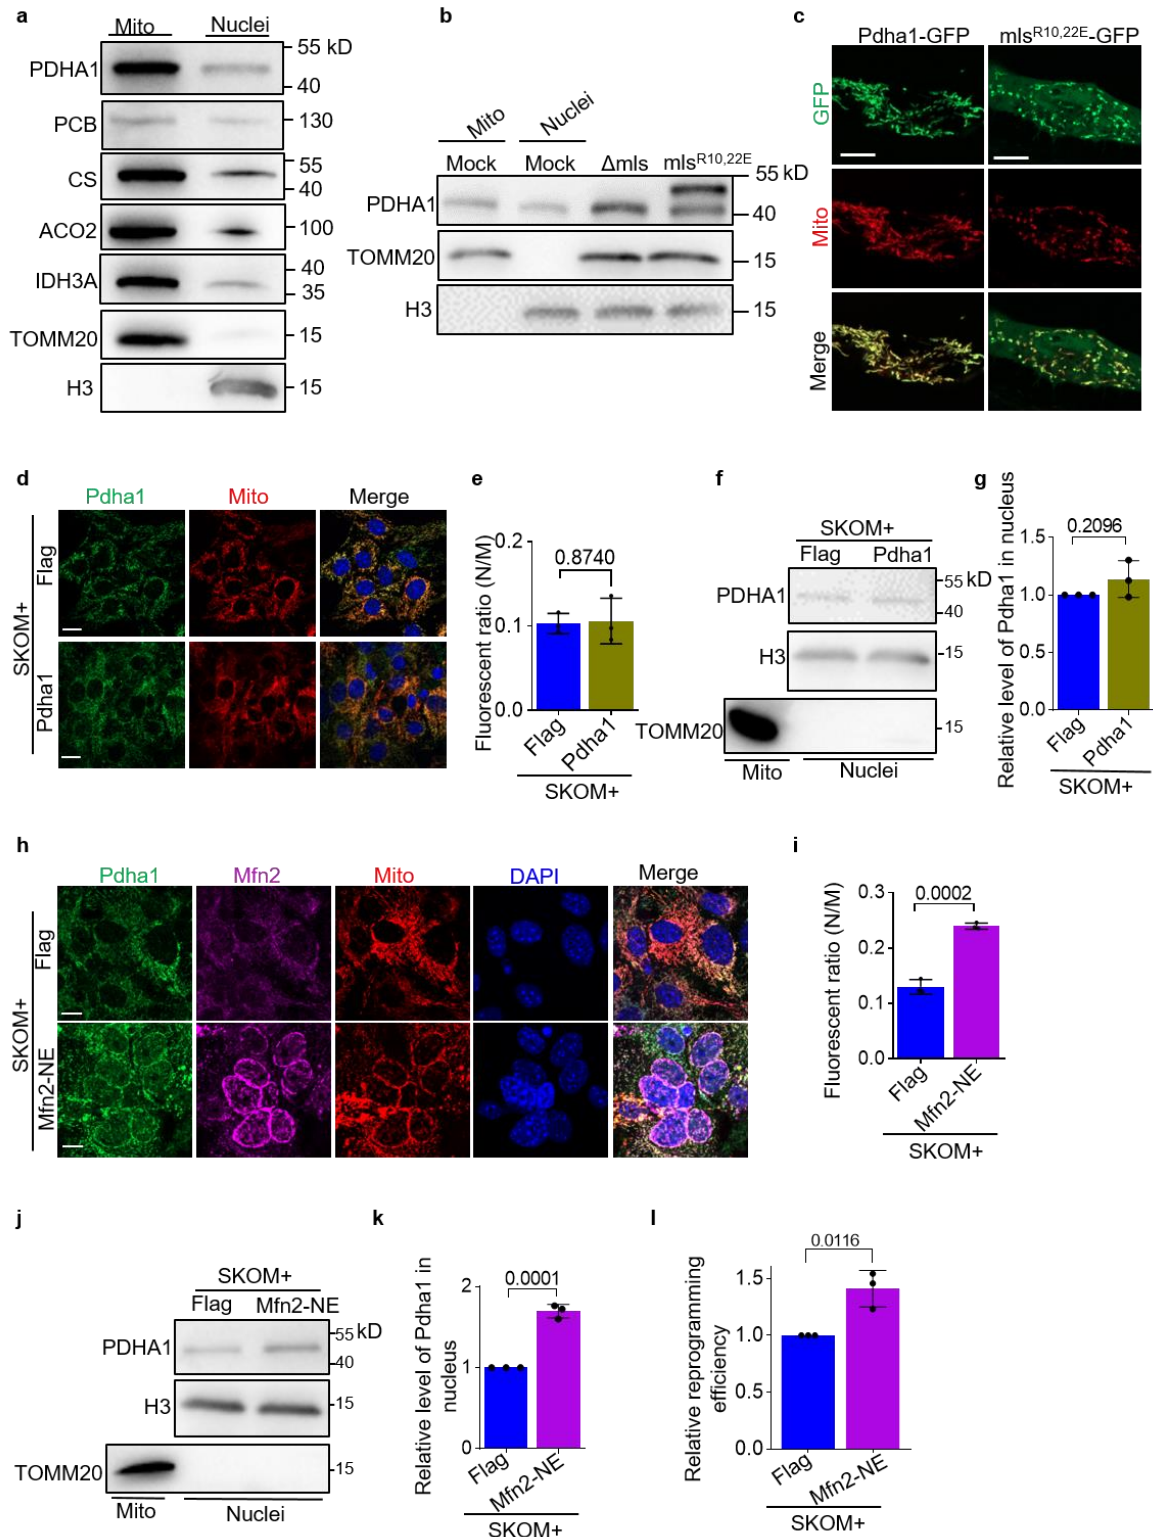

**Supplementary Figure 2. The Translocation of TCA Cycle Enzymes to the Nucleus.**

**a**, The western blot analysis of PDHA1, PCB, CS, ACO2 and IDH3A in the fraction of mitochondria or nuclei of ESCs. **b**, The western blot analysis of PDHA1 in the mitochondrial or nuclear fractions of ESCs. The samples transfected with

mitochondrial localization sequence (mls) deletion mutant ( $\Delta$ mls) or mls point mutant (mls<sup>R10,22E</sup>) of Pdha1 were set as control. **c**, Representative images of Pdha1 or the mls<sup>R10,22E</sup> mutant. The mito-DsRed (Mito) was used as a marker of mitochondria. Scale bars, 5  $\mu$ m. **d**, Immunostaining of Pdha1 (green) in MEFs transduced with SKOM plus Pdha1 or Flag on day 4. The mito-DsRed (Mito) was used as a marker of mitochondria. Scale bars, 10  $\mu$ m. **e**, The count of nuclei/mitochondria fluorescent (N/M) ratio of Pdha1 for (**d**). **f,g**, The western blot of Pdha1 in the nucleus of MEFs transduced with SKOM plus Pdha1 or Flag on day 4 (**f**), as well as the quantification (**g**). **h**, Immunostaining of Pdha1 (green) in MEFs transduced with SKOM plus Mfn2-NE or Flag on day 4. The mito-DsRed (Mito) was used as a marker of mitochondria. Scale bars, 10  $\mu$ m. **i**, The N/M ratio of Pdha1 in (**h**) were detected. **j,k**, The western blot analysis of Pdha1 in the nucleus of MEFs transduced with SKOM plus Mfn2-NE or Flag on day 4 (**j**), as well as the quantification (**k**). **l**, Relative somatic cell reprogramming efficiency after transduced with Mfn2-NE together with SKOM. The reprogramming efficiency was determined by counting the GFP-positive colonies. The TOMM20 was an indicator of mitochondrial content, while H3 was a loading control (**a,b,f,j**). Data are presented as the mean  $\pm$  S.D and n = 3 independent experiments. At least 30 cells were counted in each experiment (**e,i**). A two-tailed unpaired Student's *t*-test was used (**e,g,i,k,l**).

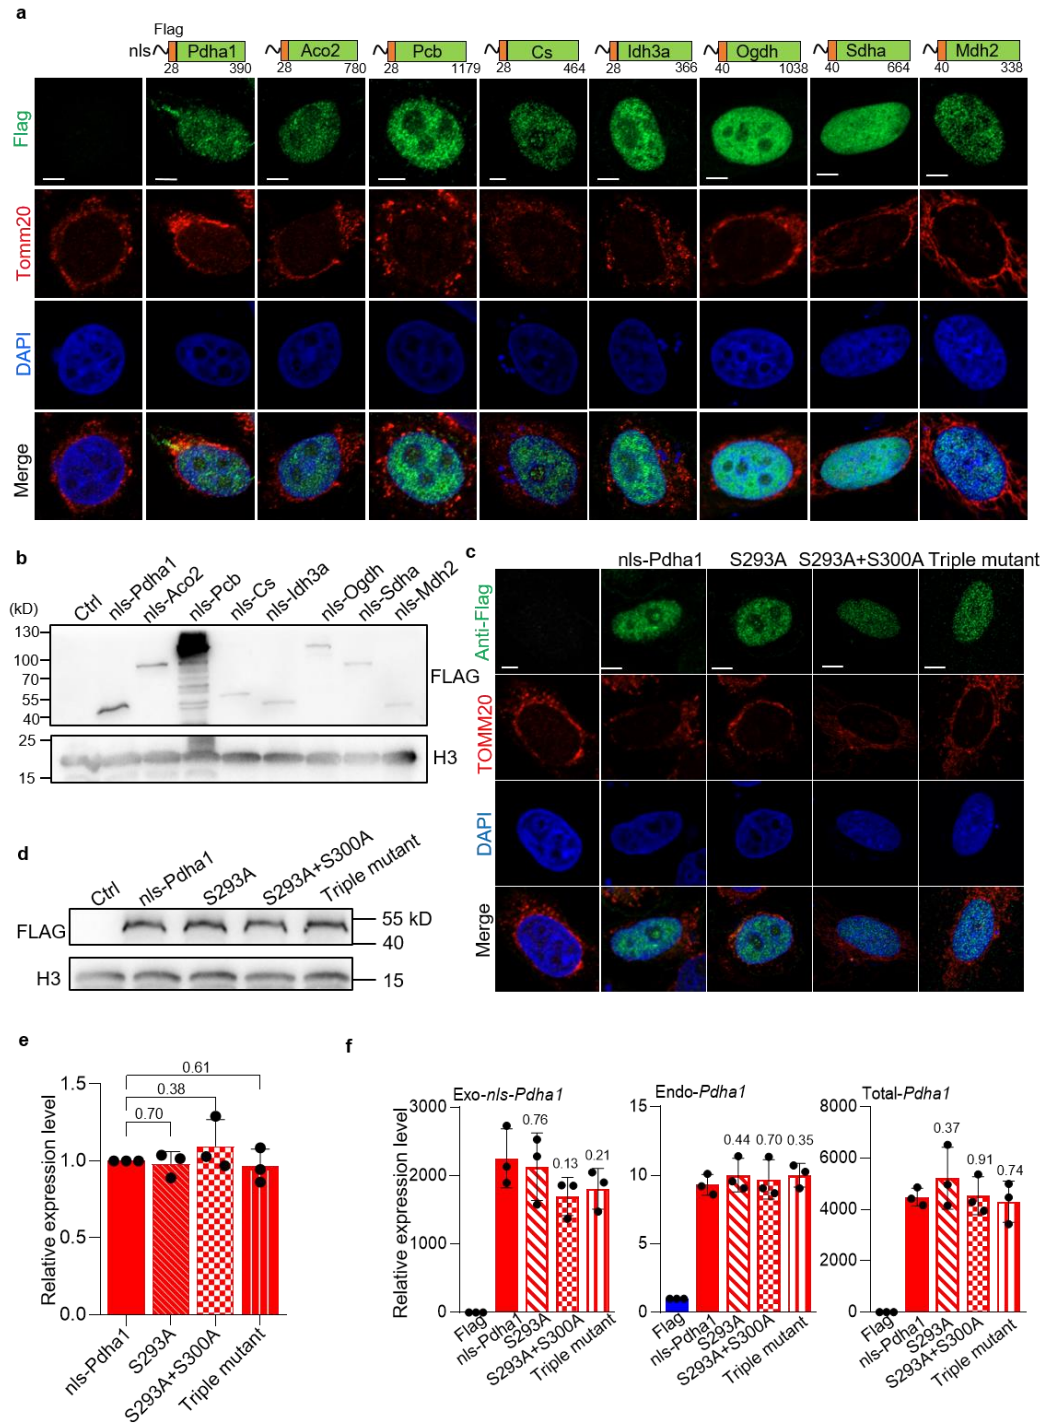

**Supplementary Figure 3. The Localization and Overexpression of the Nuclear Localized TCA Cycle Enzymes and Pdha1 Mutants.** **a**, The localization of TCA cycle enzymes as nls-Pdha1, nls-Pcb, nls-Aco2, nls-Cs, nls-Idh3a, nls-Ogdh, nls-Sdha and nls-Mdh2. Schematic diagrams are shown at the top and the immunostaining of

these fusion proteins with anti-Flag antibody (green) are presented below. Scale bars, 5  $\mu$ m. **b**, The overexpression of nuclear located TCA cycle enzymes were detected by western blot with anti-Flag. **c**, The localization of TCA cycle enzymes nls-Pdha1 and the S->A point mutations in the catalytic subunit of nls-Pdha1 at S232, S293 and S300 including S293A, S293A+S300A or S232A+S293A+S300A (Triple mutant). The immunostaining of these fusion proteins with anti-Flag antibody (green) are detected. Scale bars, 5  $\mu$ m. **d,e**, Western blot (**d**) and quantification (**e**) of MEFs after overexpression nls-Pdha1, or nuclear targeted catalytic mutants of S293A, S293A+S300A or Triple mutant. **f**, The relative expression level of *exo-nls-Pdha1*, *endo-Pdha1* and *Total-Pdha1* were quantified by qPCR after overexpression of nls-Pdha1 or nuclear targeted catalytic mutants of S293A, S293A+S300A or Triple mutant. Cells overexpressing Flag were used as control. Data are presented as mean  $\pm$  S.D, n = 3 independent experiments (**a-f**), and two-tailed unpaired Student's t test were used (**e-f**).



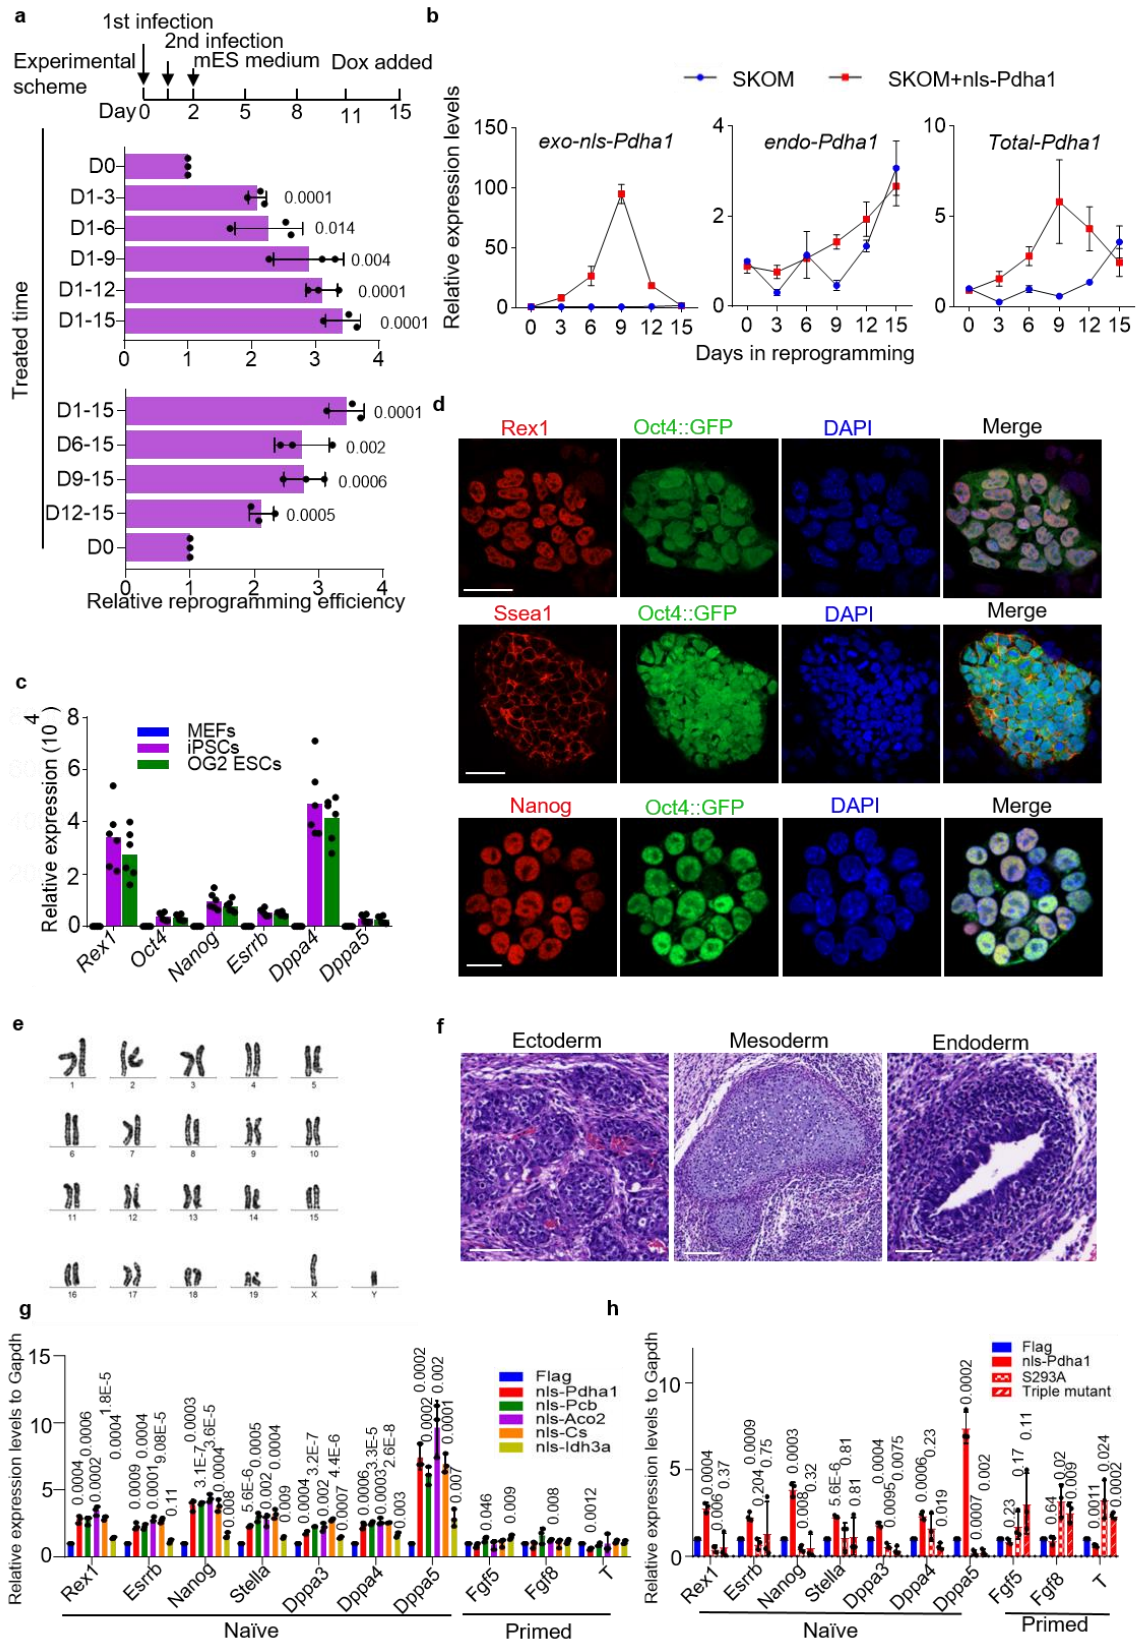

**Supplementary Figure 4. Pluripotency Identification of nls-Pdha1-iPSCs** a, The reprogramming efficiency with nls-Pdha1 overexpression induced by Dox at different time intervals. DOX was added as indicated and relative reprogramming efficiency were

calculated by compared with DOX-free control. **b**, The relative expression of *exo-nls-Pdha1*, *endo-Pdha1* and *Total-Pdha1* during SKOM-mediated reprogramming with or without *nls-Pdha1*. **c**, The relative expression of endogenous pluripotency genes (*Rex1*, *Oct4*, *Nanog*, *Esrrb*, *Dppa4* and *Dppa5*). (n = 6 colonies for each group). **d**, Oct4::GFP images and immunofluorescence staining of Rex1, Ssea1 and Nanog (red) for indicating pluripotency in iPSC colonies derived from OG2 MEFs after overexpression *nls-Pdha1* (*nls-Pdha1*-iPSCs). Scale bars, 5  $\mu$ m. **e**, The karyotype of a representative *nls-Pdha1*-iPSC colonies. **f**, Three germ layers derived tissues of the teratoma derived from *nls-Pdha1*-iPSC colonies. Scale bars, 200  $\mu$ m. **g**, The relative expression level of naïve makers (*Rex1*, *Esrrb*, *Nanog*, *Stella*, *Dppa3*, *Dppa4* and *Dppa5*) and primed markers (*Fgf5*, *Fgf8* and *T*) were quantified by qPCR after overexpression of nuclear translocated enzymes including *nls-Pdha1*, *nls-Pcb*, *nls-Aco2*, *nls-Cs* and *nls-Idh3a* during PNT. Flag was used as control. **h**, The relative expression level of naïve makers (*Esrrb*, *Rex1*, *Oct4*, *Sox2*, *Nanog*, *Stella*, *Dppa3*, *Dppa4* and *Dppa5*) was quantified by qPCR after overexpression of *nls-Pdha1* or nuclear targeted catalytic mutants of *Pdha1*—S293A or S232A+S293A+S300A (Triple mutant) during PNT. Cells overexpressing Flag were used as control. Data are presented as mean  $\pm$  S.D, n = 3 independent experiments (**a**, **b**, **d-h**), and two-tailed unpaired Student's t test were used (**a**, **b**, **g**, **h**).



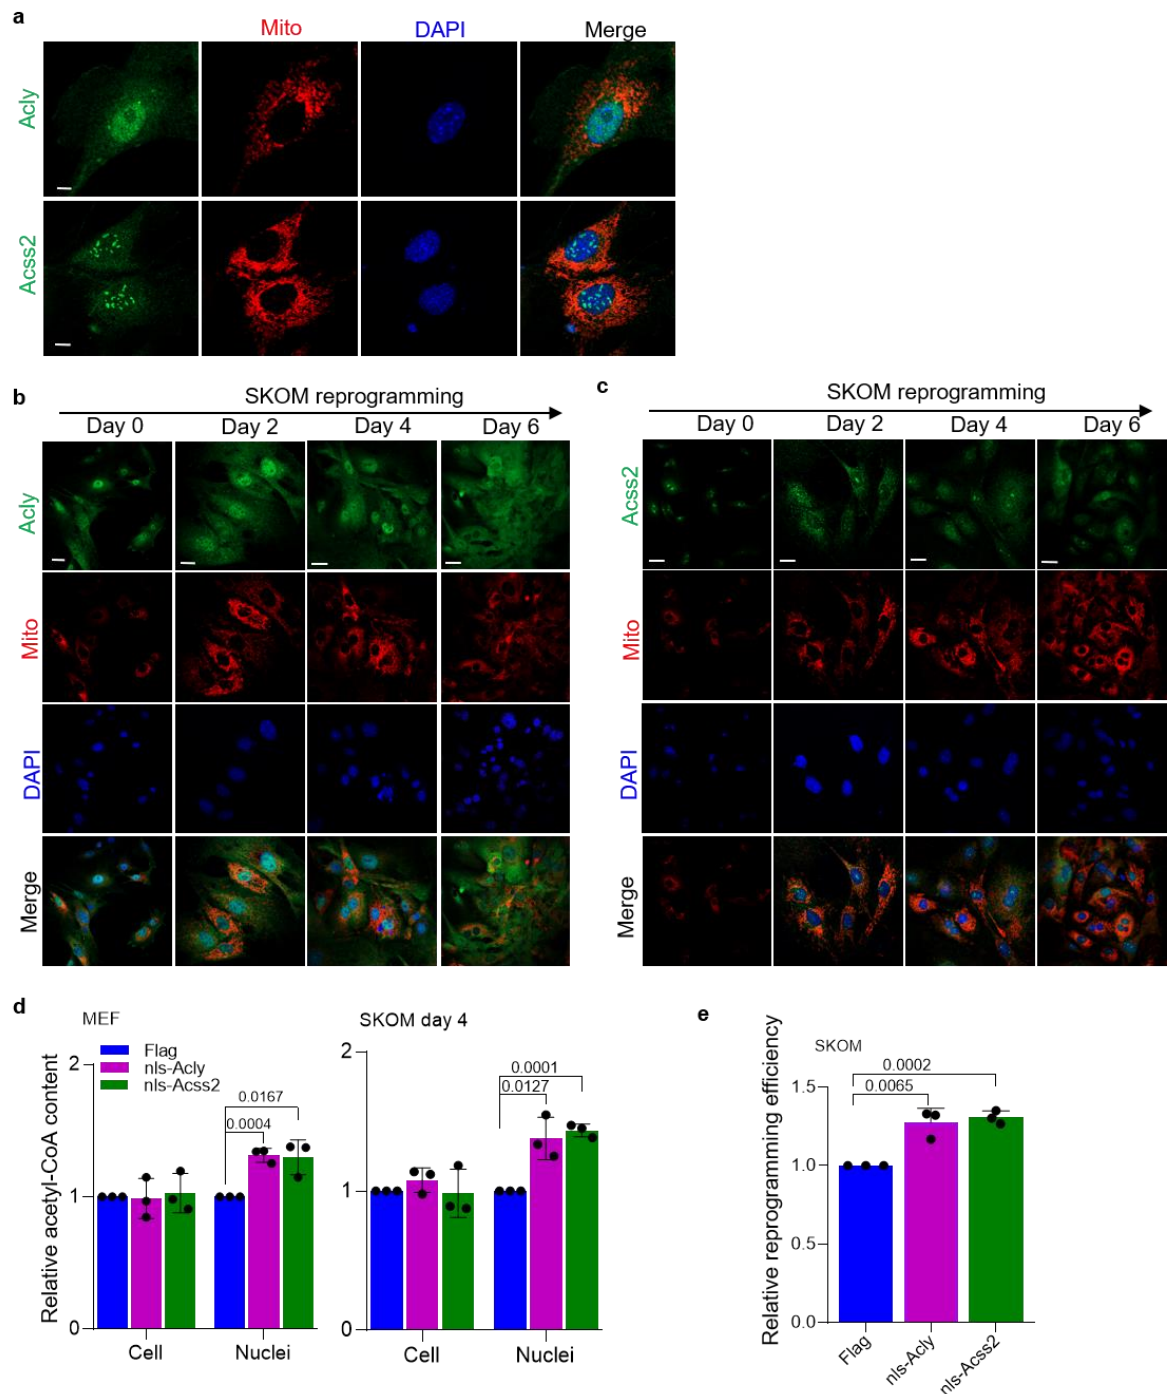

**Supplementary Figure 5. The Nuclear Localized Acly and Acss2 Modulates Somatic Cell Reprogramming.** **a**, The localization of Acly and Acss2 in MEFs. Acly and Acss2 were stained with antibodies. The mito-DsRed (Mito) was used as a marker of mitochondria. Scale bars, 5  $\mu$ m. **b**, **c**, The localization of Acly (green) (**b**), Acss2 (green) (**c**) during somatic cell reprogramming with SKOM. The mito-DsRed (Mito) was used as a marker of mitochondria. Scale bars, 5  $\mu$ m. **d**, Relative content of acetyl-

CoA in whole-cell, cytoplasm or nucleus of MEFs in somatic cell reprogramming with SKOM. Cells after overexpression of Flag, nls-Acly or nls-Acss2 were tested. **e**, Relative somatic cell reprogramming efficiency after transducing with nls-Acly or nls-Acss2 together with SKOM. The reprogramming efficiency was determined by counting the GFP-positive colonies. Data are presented as mean  $\pm$  S.D (**d-e**),  $n = 3$  independent experiments (**a-e**), and two-tailed unpaired Student's  $t$  test were used (**d-e**).

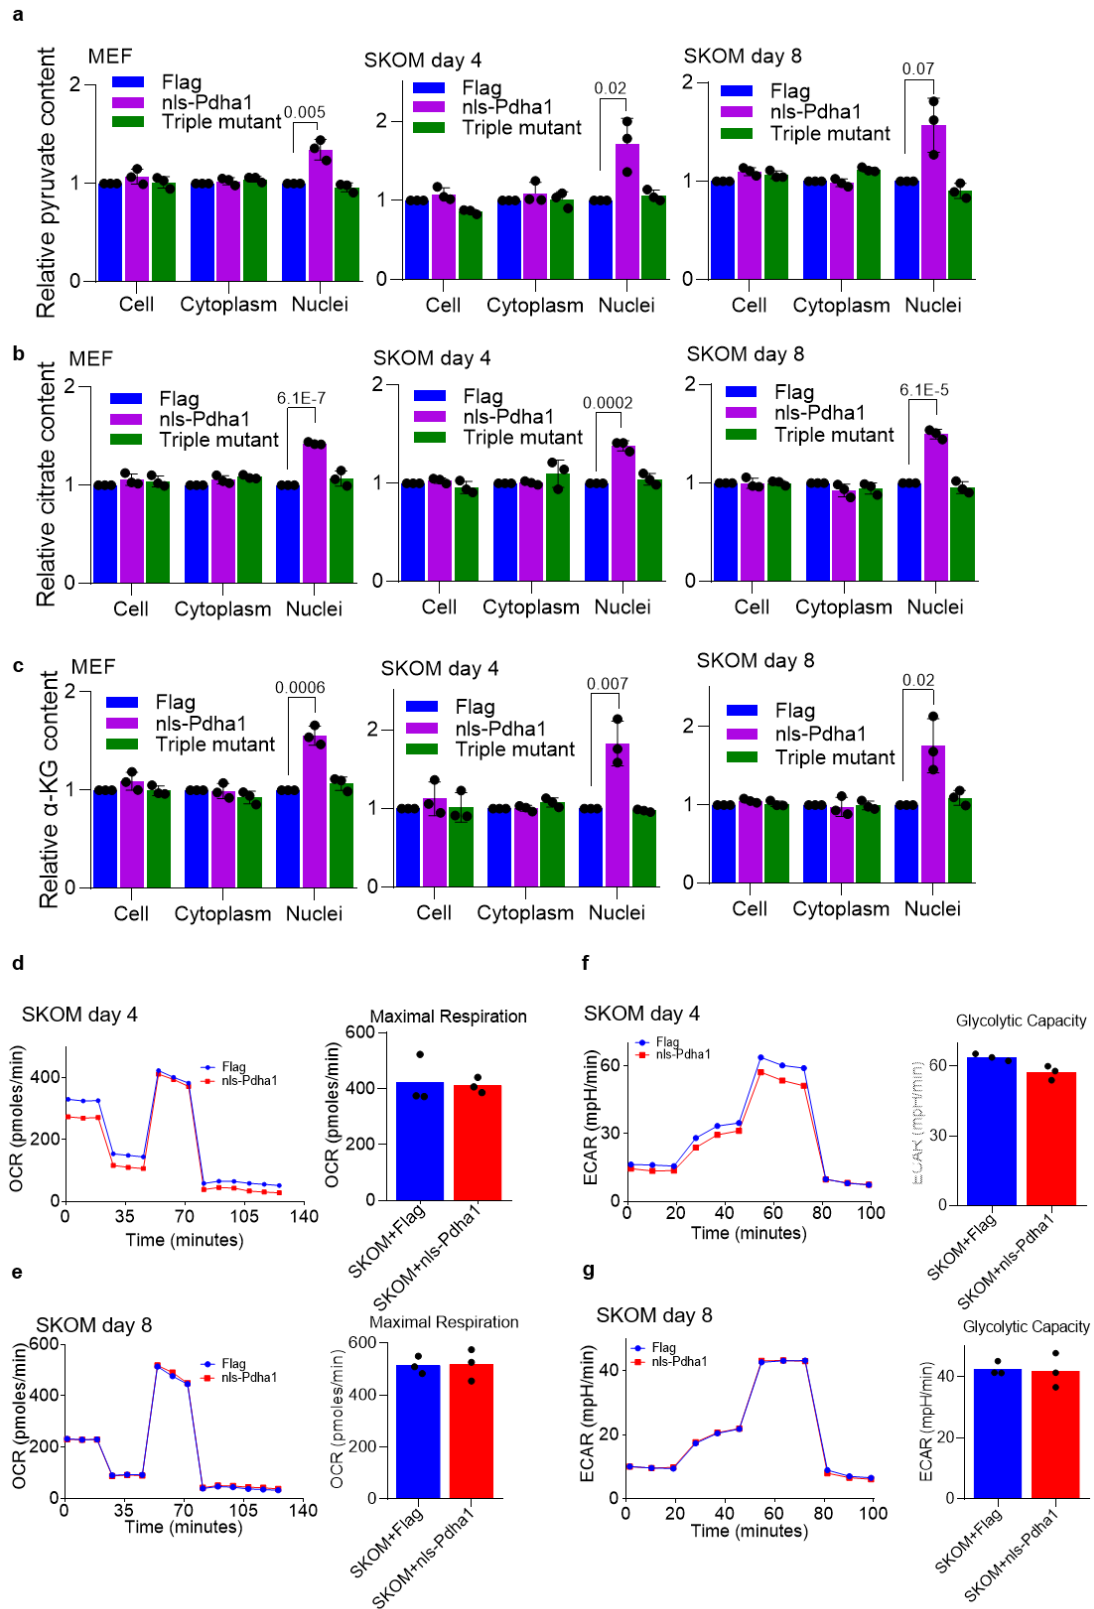

**Supplementary Figure 6. Nuclear Pdha1 Promotes the Metabolites of TCA Cycle in the Nucleus during Somatic Cell Reprogramming.** a-c, Relative content of pyruvate (a), citrate (b) or  $\alpha$ -KG (c) in whole-cell, cytoplasm or nucleus of MEFs

during somatic cell reprogramming with SKOM. Cells after overexpression of Flag, nls-Pdha1 or nls-Pdha1 with triple mutation of its catalytic domain (Triple mutant) were tested. Data are presented as mean  $\pm$  S.D, n = 3 independent experiments, and two-tailed unpaired Student's t test were used (**a-c**). **d,e**, Mitochondrial stress test using Seahorse XF24 on day 4 (**d**) and day 8 (**e**). Oxygen consumption rate (OCR) of mitochondrial maximal respiration was quantified. Reprogramming cell induced by SKOM plus nls-Pdha1 were tested with SKOM plus Flag as control. **f,g**, Glycolysis-stress test on day 4 (**f**) and day 8 (**g**). Extracellular acidification rate (ECAR) was quantified from the glycolysis-stress test. n = 2 independent experiments were repeated with similar results, and one replicate (n = 1, each group) was used for this assay (**d-g**).

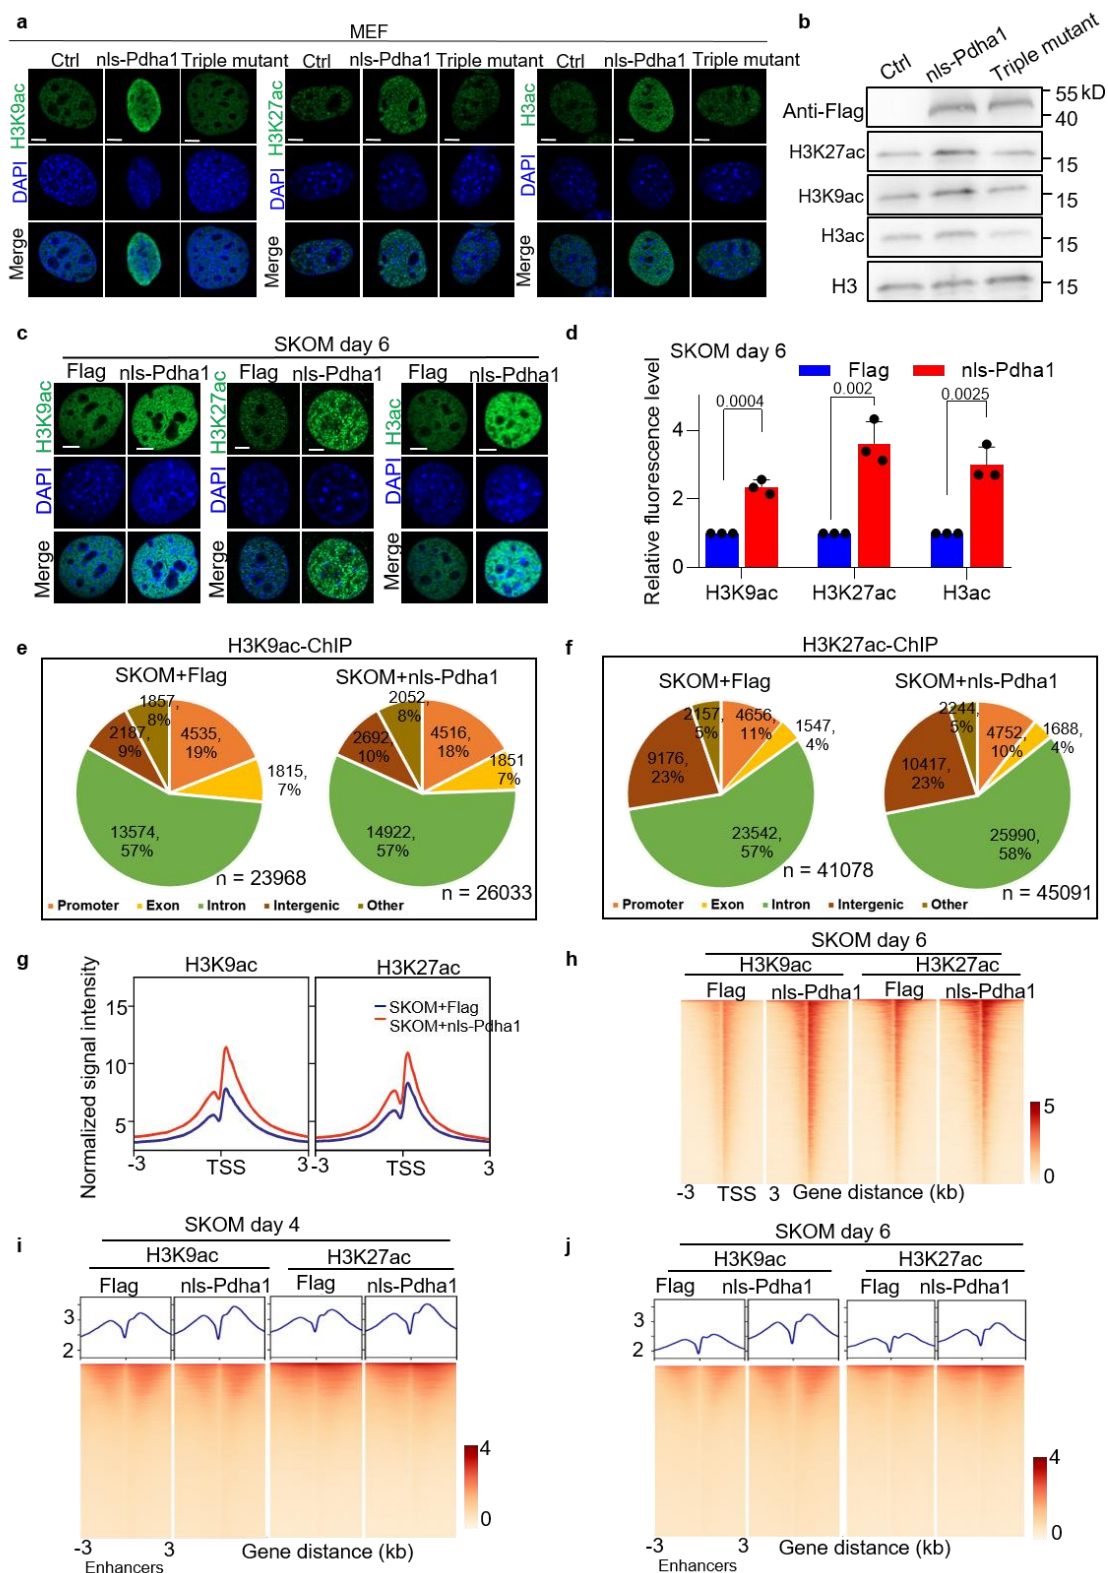

**Supplementary Figure 7. Nuclear Pdha1 Promotes Histone Acetylation in Somatic Cell Reprogramming.** **a**, Representative images of H3K9ac, H3K27ac, and H3ac (green) in MEFs plus nls-Pdha1, Triple mutant or Flag (control). Scale bars, 5  $\mu$ m. **b**, Western blot analysis of H3K9ac, H3K27ac and H3ac in MEFs with nls-Pdha1 or

Triple mutant overexpression. Anti-Flag was targeting nls-Pdha1 and Anti-H3 was used as a loading control. **c,d**, Representative images (**c**) and quantification (**d**) of H3K9ac, H3K27ac, and H3ac (green) at day 6 of cell reprogramming with SKOM plus nls-Pdha1 or Flag (control). Scale bars, 5  $\mu$ m. **e,f**, Pie charts of H3K9ac (**e**) or H3K27ac (**f**) ChIP-seq data showing the distribution of peaks in MEFs transduced with SKOM with or without nls-Pdha1 overexpression at day 4. **g,h**, Pileup (**g**) and heatmap (**h**) of H3K9ac and H3K27ac ChIP-seq near the TSS in MEFs transduced with SKOM plus nls-Pdha1 or Flag on day 6.  $n = 2$  independent experiments were repeated with similar results (**e-h**), and one replicate ( $n = 1$ , each group) was used for this assay (upstream 3 kb and downstream 3 kb of the TSS). **i,j**, Heatmap and pileup of H3K9ac, H3K27ac ChIP-seq near the enhancer in MEFs transduced with SKOM plus nls-Pdha1 or Flag on day 4 (**i**) or day 6 (**j**).  $n = 2$  independent experiments were repeated with similar results, and one replicate ( $n = 1$ , each group) was used for this assay (upstream 3 kb and downstream 3 kb of the enhancer) (**i,j**). Data are presented as the mean  $\pm$  S.D (**d**) and  $n = 3$  independent experiments (**a-d**). At least 30 cells were counted in each experiment (**d**). A two-tailed unpaired Student's *t*-test was used (**d**).



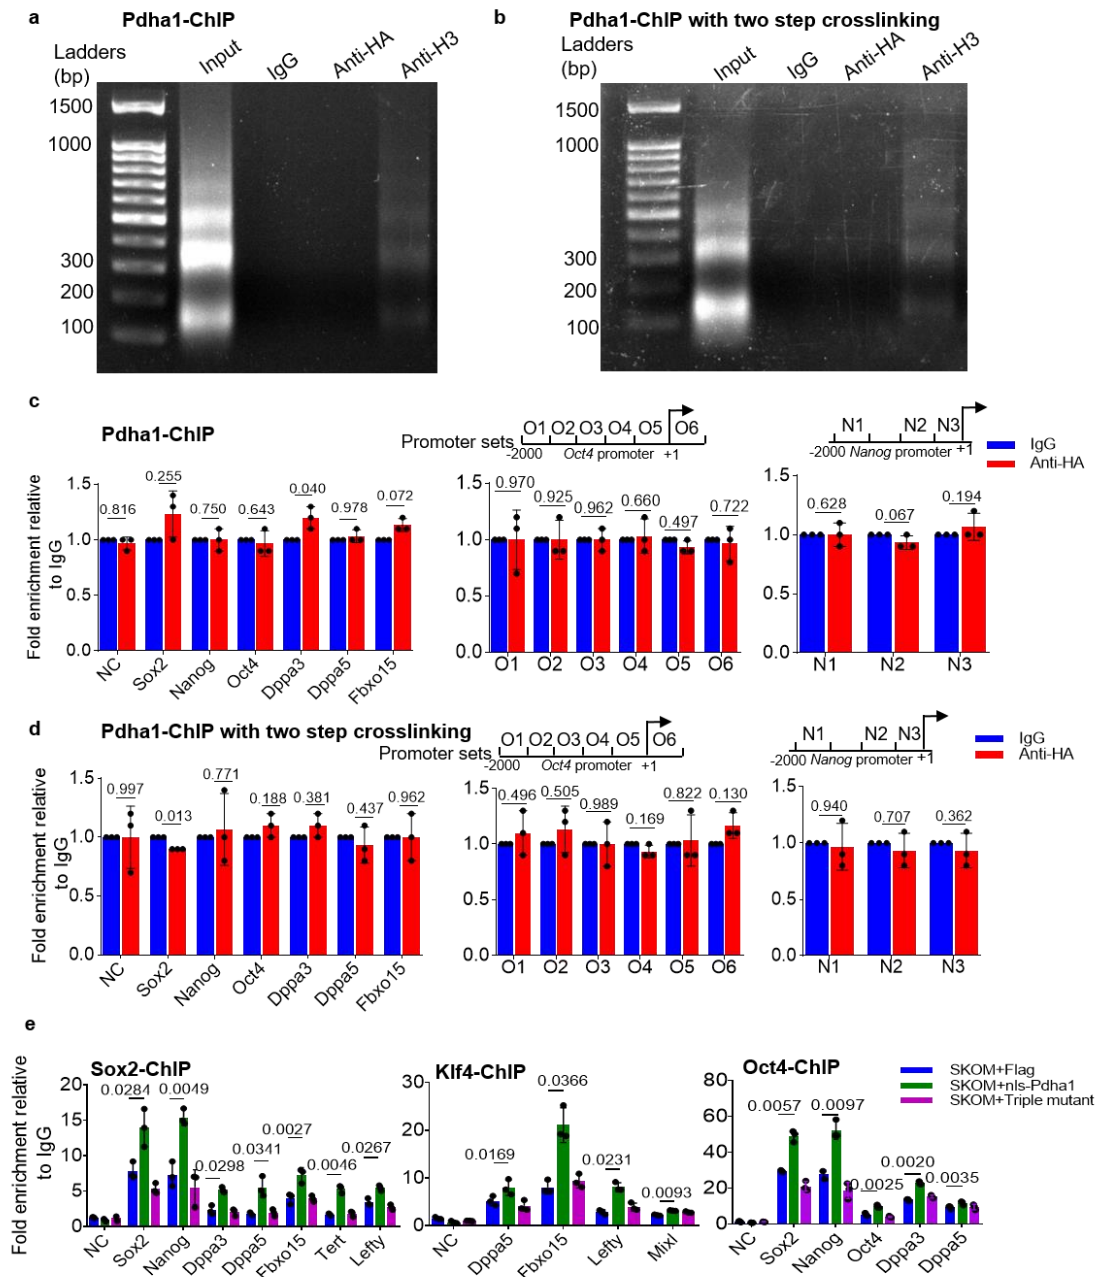

**Supplementary Figure 8. The Nuclear Pdha1 Promote Reprogramming with Epigenetic Modulation.** **a,b,** Gel electrophoresis of DNA enriched by ChIP-assay with antibody targeting HA-tag, which was fused with nls-Pdha1 (Input = 2%). A canonical ChIP assay (**a**) or two-step crosslinking ChIP assay (**b**) were performed. Anti-H3 was set as a positive control. About  $4 \times 10^6$  cells after transduced with SKOM plus nls-Pdha1 on day 4 were collected. **c,** ChIP-qPCR analysis of nls-Pdha1 enrichment on promoter regions of pluripotency genes (*Sox2*, *Nanog*, *Oct4*, *Dppa3*, *Dppa5*, *Fbxo15*). The promoter of *Oct4* (O1-O6) and *Nanog* (N1-3) were detailed. **d,** Two-step cross-linking

ChIP assay about the nls-Pdha1 enrichment on promoter regions of pluripotency genes (*Sox2*, *Nanog*, *Oct4*, *Dppa3*, *Dppa5*, *Fbxo15*). The promoter of *Oct4* (O1-O6) and *Nanog* (N1-3) were detailed. **e**, ChIP-qPCR assay in detecting the binding of Sox2, Klf4 and Oct4 to their respective targets in MEFs infected with SKOM plus Flag, nls-Pdha1 or Triple mutant. Data are presented as the mean  $\pm$  S.D (**c-e**) and n = 3 independent experiments (**a-e**). A two-tailed unpaired Student's *t*-test was used (**c-e**).

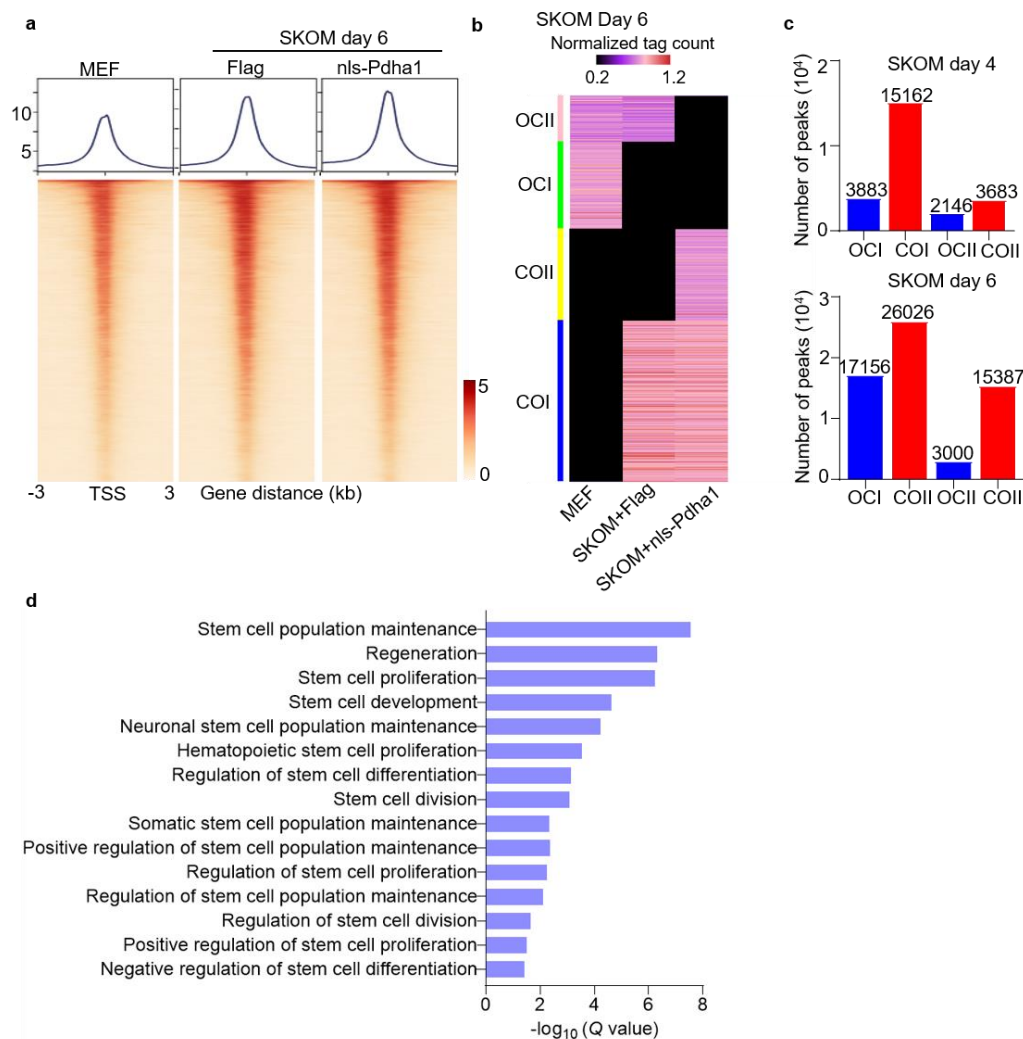

**Supplementary Figure 9. Nuclear Pdh1 Loosens Chromatin.** **a**, Heatmap and pileup of ATAC-seq signal near the TSS in MEFs and MEFs transduced with SKOM plus nls-Pdha1 or Flag on day 6. Three replicates ( $n = 3$ , each group) were used for ATAC assay. (Upstream 3 kb and downstream 3 kb of the TSS). **b**, Heatmap of ATAC-seq OC/CO loci on day 6 during reprogramming: closed in Flag but open in SKOM+Flag and SKOM+nls-Pdha1 (COI), closed in Flag and SKOM+Flag but open in SKOM+nls-Pdha1 (COII), open in Flag but closed in SKOM+Flag and SKOM+nls-Pdha1 (OCI), open in Flag and SKOM+Flag but closed in SKOM+nls-Pdha1 (OCII). Units are in normalized sequence tag counts. Three replicates ( $n = 3$ , each group) were used for the ATAC assay. **c**, The number of peaks of each type by ATAC-seq on day 4 (up panel) and day 6 (down panel) (COI/OCI/COII/OCII). **d**, GO analysis for COII peaks of ATAC-seq defined in **Fig. 6d** on day 4 during reprogramming. 3 independent

experiments were repeated with similar results, and one replicate ( $n = 1$ , each group) was used for this analysis (**b-e**).

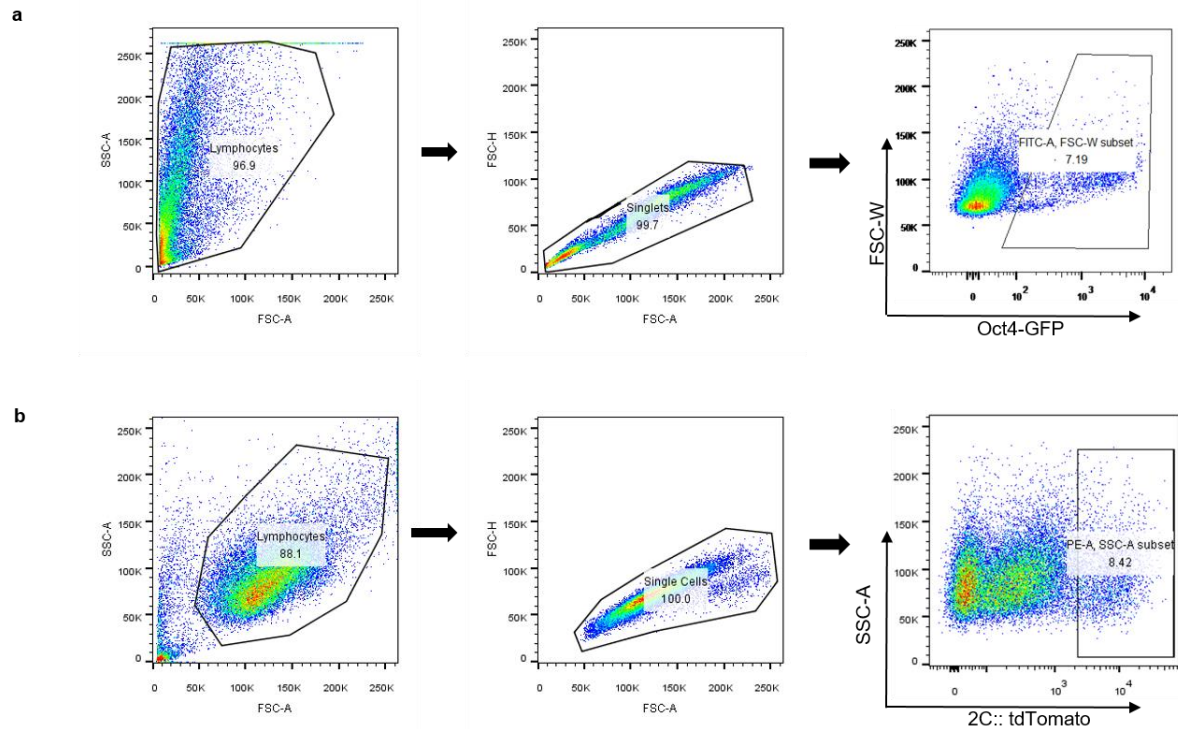

**Supplementary Figure 10.** FACS gating strategy **a.** FACS gating strategy for flow cytometry analysis of GFP positive naïve stem cell colonies generated from EpiSCs with nls-Pdha1, nls-Pdha1-mutant (S293A, Triple mutant), nls-Pcb, nls-Aco2, nls-Cs or nls-Idh3a overexpression. in Fig. 3g, i. **b.** FACS gating strategy for flow cytometry analysis (gated on 2C:: tdTomato cells) showing the relative proportion of 2C:: tdTomato-positive totipotency stem cells generated from OG2 ESCs with overexpression of nls-Pdha1 or nls-Pdha1-mutant (S293A, Triple mutant) in Fig. 3k.

**Supplementary Table 1. The plasmids used in this paper.**

| Plasmids                                  | Source     | Catalog |
|-------------------------------------------|------------|---------|
| pMXs-Sox2                                 | Addgene    | 13367   |
| pMXs-Klf4                                 | Addgene    | 13370   |
| pMXs-Oct3/4                               | Addgene    | 13366   |
| pMXs-cMyc                                 | Addgene    | 13375   |
| pMXs-Pdha1                                | This paper | N/A     |
| pMXs-nls-3xFlag-Pdha1                     | This paper | N/A     |
| pMXs-nls-3xFlag-Pcb                       | This paper | N/A     |
| pMXs-nls-3xFlag-Aco2                      | This paper | N/A     |
| pMXs-nls-3xFlag-Cs                        | This paper | N/A     |
| pMXs-nls-3xFlag-Idh3a                     | This paper | N/A     |
| pMXs-nls-3xFlag-Ogdh                      | This paper | N/A     |
| pMXs-nls-3xFlag-Sdha                      | This paper | N/A     |
| pMXs-nls-3xFlag-Mdh2                      | This paper | N/A     |
| pMXs-nls-3xFlag-Pdha1-S293A               | This paper | N/A     |
| pMXs-nls-3xFlag-Pdha1-(S239A+S300A)       | This paper | N/A     |
| pMXs-nls-3xFlag-Pdha1-(S232A+S239A+S300A) | This paper | N/A     |
| pMXs- nls-HA-Pdha1                        | This paper | N/A     |
| pMXs-Δmls-Pdha1                           | This paper | N/A     |
| pMXs-mls <sup>R10,22E</sup> -Pdha1        | This paper | N/A     |
| pMXs-Pdha1-GFP                            | This paper | N/A     |
| pMXs-mls <sup>R10,22E</sup> -Pdha1-GFP    | This paper | N/A     |
| pMXs-Mfn2-NE                              | This paper | N/A     |
| pMXs-nls-3xFlag-Acly                      | This paper | N/A     |
| pMXs-nls-3xFlag-Acss2                     | This paper | N/A     |
| pW-nls-Pdha1                              | This paper | N/A     |



|                                                       |            |       |
|-------------------------------------------------------|------------|-------|
| pMXs-mitoDsRed                                        | This paper | N/A   |
| pRLenti-mitoDsred                                     | This paper | N/A   |
| pRLenti-3xFlag-puro                                   | This paper | N/A   |
| pRLenti-nls-3xFlag-Pdha1-puro                         | This paper | N/A   |
| pRLenti-nls-3xFlag-Pcb-puro                           | This paper | N/A   |
| pRLenti-nls-3xFlag-Aco2-puro                          | This paper | N/A   |
| pRLenti-nls-3xFlag-Cs-puro                            | This paper | N/A   |
| pRLenti-nls-3xFlag-Idh3a-puro                         | This paper | N/A   |
| pRLenti-nls-3xFlag-Pdha1- S293A -puro                 | This paper | N/A   |
| pRLenti-nls-3xFlag-Pdha1-<br>(S232A+S239A+S300A)-puro | This paper | N/A   |
| psPAX2                                                | Addgene    | 12260 |
| pMD2.G                                                | Addgene    | 12259 |

**Supplementary Table 2. The reagent used in this paper.**

| Reagent                                             | Source        | Catalog        |
|-----------------------------------------------------|---------------|----------------|
| DMEM-Dulbecco's Modified Eagle Medium, High Glucose | Gibco         | 11995500BT     |
| FBS                                                 | Gibco         | 10099141       |
| GlutaMAX                                            | Gibco         | 35050079       |
| Non-Essential Amino Acids Solution (NEAA)           | Gibco         | 11140076       |
| Sodium Pyruvate Solution                            | Gibco         | 11360070       |
| N2                                                  | Gibco         | 17502048       |
| B27                                                 | Gibco         | 17504044       |
| $\beta$ -Mercaptoethanol                            | Gibco         | 21985-023      |
| Penicillin-Streptomycin Solution                    | Hyclone       | SV30010        |
| CHIR99021                                           | Selleck       | S1263          |
| PD0325901                                           | Selleck       | S1036          |
| XAV-939                                             | Selleck       | 284028-89-3    |
| bFGF                                                | R&D Systems   | 3139-FB-025/CF |
| polyethyleneimine                                   | PolyScience   | 23966-1        |
| Activin A                                           | Novoprotein   | C687           |
| Trypsin-EDTA (0.25%), phenol red                    | Gibco         | 25200114       |
| Trypsin-EDTA (0.05%), phenol red                    | Gibco         | 25300054       |
| Formaldehyde                                        | Sigma         | 252549         |
| Igepal CA-630                                       | Sigma         | I8896          |
| Glycine                                             | Sigma         | G8898          |
| RIPA                                                | Beyotime      | P0013B         |
| Disuccinimidyl glutarate (DSG)                      | HARVEYBIO     |                |
| PMSF                                                | Beyotime      | ST506          |
| TRIzol                                              | Thermo Fisher | 15596018       |
| Triton X-100                                        | Sigma         | T8787          |

|                              |           |             |
|------------------------------|-----------|-------------|
| DAPI                         | Sigma     | D9542       |
| Giemsa stain                 | Coolaber  | SI7010      |
| Fluorescence mounting medium | DAKO      | S3023       |
| protease inhibitor cocktail  | Roche     | 04693116001 |
| ECL solution                 | Millipore | WBKLS0500   |

**Supplementary Table 3. The kit used in this paper.**

| Kit                                                    | Source               | Catalog    |
|--------------------------------------------------------|----------------------|------------|
| SYBR Green QPCR kit                                    | TaKaRa               | RR820A     |
| Reverse Transcription kit                              | TaKaRa               | RR047A     |
| RNA Purification kit                                   | EZBioscience         | B0004DP    |
| Seahorse XF Cell Mito Stress Test Kit                  | Agilent Technologies | 103015-100 |
| Seahorse XF Glycolysis Stress Test Kit                 | Agilent Technologies | 103020-100 |
| H&E Staining Kit                                       | Abcam                | Ab245880   |
| Nuclei Pure Prep Nuclei Isolation kit                  | Sigma                | NUC201     |
| SimpleChIP Enzymatic Chromatin IP Kit (Magnetic Beads) | CST                  | 9003       |
| Nuclear and Cytoplasmic Protein Extraction kit         | Beyotime             | P0028      |
| PicoProbe AcetylCoA Fluorometric Assay kit             | Biovision            | K317       |
| Pyruvate Colorimetric/Fluorometric Assay kit           | Biovision            | K609       |
| Citrate Colorimetric/Fluorometric Assay kit            | Biovision            | K655       |
| Alpha-Ketoglutarate Dehydrogenase Activity Assay kit   | Biovision            | K678       |
| Qproteome Mitochondria Isolation Kit                   | Qiagen               | 37612      |

**Supplementary Table 4. The oligos used in this paper.**

|                 |                                    |
|-----------------|------------------------------------|
| Tn5ME-A-ATTO590 | TCGTCGGCAGCGTCAGATGTGTATAAGAGACAG  |
| Tn5ME-B-ATTO590 | GTCTCGTGGGCTCGGAGATGTGTATAAGAGACAG |
| Tn5MErev        | [phos]CTGTCTCTTATACACATCT          |

**Supplementary Table 5. The antibodies used in this paper.**

| Antibodies                                          | Company    | Catalog  |
|-----------------------------------------------------|------------|----------|
| Anti-Lamin B1                                       | Abcam      | ab8982   |
| Anti-Lamin B1                                       | Abcam      | ab16048  |
| Anti-Histone H3 antibody                            | Abcam      | ab1791   |
| Anti-Histone H3K27ac antibody                       | CST        | 8173     |
| Anti-Histone H3K9ac antibody                        | CST        | 9649     |
| Anti-Histone H3 (acetyl K9 + K14 + K18 + K23 + K27) | Abcam      | ab47915  |
| Anti-IgG                                            | CST        | 2729     |
| Anti-Histone H3K36me3 antibody                      | Abcam      | ab194677 |
| Anti-Histone H3K27me3 antibody                      | Abcam      | ab272165 |
| Anti-Histone H3K9me3 antibody                       | Abcam      | ab8898   |
| Anti-Tomm20 antibody                                | Abcam      | ab56783  |
| Anti-Pdha1                                          | Abcam      | ab110334 |
| Anti-PCB[3H2AD9]                                    | Abcam      | ab110314 |
| Anti-PCB antibody-C-terminal                        | Abcam      | ab229267 |
| Anti-Aconitase 2[6F12BD9]                           | Abcam      | ab110321 |
| Anti-Idh3a antibody                                 | Abcam      | ab228596 |
| Anti-Citrate synthetase                             | Abcam      | ab96600  |
| Anti-OGDH- C-terminal                               | Abcam      | ab137773 |
| Anti-MDH <sub>2</sub> [2F5AF8]                      | Abcam      | ab110317 |
| Anti-Sdha                                           | Abcam      | ab14715  |
| Anti-FLAG                                           | SIGMA      | F1804    |
| Anti-SSEA1 antibody                                 | Santa Cruz | sc-21702 |
| Anti-Rex1 antibody                                  | Santa Cruz | sc-50668 |
| Anti-Nanog                                          | CST        | 4903S    |
| Anti-P300                                           | CST        | 54062    |



|                                             |             |           |
|---------------------------------------------|-------------|-----------|
| Anti-Sox2                                   | CST         | 23064     |
| Anti-Oct4                                   | CST         | 83932     |
| Anti-Klf4                                   | Proteintech | 11880     |
| Anti-HA                                     | CST         | 3724      |
| Anti-Mfn2                                   | Abclonal    | A12771    |
| Goat anti-Mouse IgG (H+L), Alexa Fluor 488  | Invitrogen  | A11001    |
| Goat anti-Mouse IgG (H+L), Alexa Fluor 568  | Invitrogen  | A11004    |
| Goat anti-Rabbit IgG (H+L), Alexa Fluor 488 | Invitrogen  | A11008    |
| Goat anti-Rabbit IgG (H+L), Alexa Fluor 568 | Invitrogen  | A11011    |
| Goat anti-Mouse IgG (H+L), Alexa Fluor 647  | Invitrogen  | A21237    |
| Goat anti-Rabbit IgG (H+L), Alexa Fluor 647 | Invitrogen  | A21246    |
| HRP-conjugated goat anti-mouse antibody     | Kangchen    | KC-MM-035 |
| HRP-conjugated goat anti-rabbit antibody    | Kangchen    | KC-RB-035 |

**Supplementary Table 6. Primers for Q-PCR in this paper.**

|               |         |                            |
|---------------|---------|----------------------------|
| <i>Gapdh</i>  | Forward | AAC TTTGGCATTGTGGAAGGGCTCA |
|               | Reverse | TTGGCAGCACCAGTGGATGCAGGGA  |
| <i>Actin</i>  | Forward | GTGACGTTGACATCCGTAAAGA     |
|               | Reverse | GCCGGACTCATCGTACTCC        |
| <i>Sox2</i>   | Forward | TTCGAGGAAAGGGTTCTTGCTG     |
|               | Reverse | TCCTTCCTTGTTTGTAAACGGTCCT  |
| <i>Oct4</i>   | Forward | TGTTCCCGTCACTGCTCTGG       |
|               | Reverse | TTGCCTTGGCTCACAGCATC       |
| <i>Rex1</i>   | Forward | GGCTGCGAGAAGAGCTTTATTCA    |
|               | Reverse | AGCATTTCTTCCCGGCCTTT       |
| <i>Stella</i> | Forward | GCCGCACAGCAGATGTGAA        |
|               | Reverse | AAATCTGGATCGTTGTGCATCCT    |
| <i>Esrrb</i>  | Forward | GCACCTGGGCTCTAGTTGC        |
|               | Reverse | TACAGTCCTCGTAGCTCTTGC      |
| <i>Nanog</i>  | Forward | AAATCCCTTCCCTCGCCATC       |
|               | Reverse | GCGTTCCCAGAATTCGATGC       |
| <i>Dppa3</i>  | Forward | TGTGGAGAACAAGAGTGA         |
|               | Reverse | CTCAATCCGAACAAGTCTT        |
| <i>Dppa4</i>  | Forward | GCAGATGTCTAGTCAACCAAGC     |
|               | Reverse | TCCTGGCGTCTCAGTGTCT        |
| <i>Dppa5</i>  | Forward | GCGATAGCCCAAAGAAGT         |
|               | Reverse | ACAGAGATTGAAGCAGACAT       |
| <i>Fgf5</i>   | Forward | CCTTGCGACCCAGGAGCTTA       |
|               | Reverse | CCGTCTGTGGTTTCTGTTGAGG     |
| <i>Fgf8</i>   | Forward | TCGCGAAGCTCATTGTGGA        |
|               | Reverse | GCCGTTGCTCTTGGCAATTAG      |

|                      |                |                         |
|----------------------|----------------|-------------------------|
| <i>T</i>             | <i>Forward</i> | TTGAACTTTCCTCCATGTGCTGA |
|                      | <i>Reverse</i> | TCCCAAGAGCCTGCCACTTT    |
| <i>Exo-nls-Pdhal</i> | <i>Forward</i> | AAGCGGAAGGTCGACTACAA    |
|                      | <i>Reverse</i> | GCCCTCTTCTAGCCGATGAA    |
| <i>Endo-Pdhal</i>    | <i>Forward</i> | GTCGGTTCCCAGTCCATCAG    |
|                      | <i>Reverse</i> | GCACATGACATTTCTGTTGCG   |
| <i>Total-Pdhal</i>   | <i>Forward</i> | AGGCTGGCATAAACCTACG     |
|                      | <i>Reverse</i> | GCCGTTGCCTCCATAGAAGT    |

**Supplementary Table 7. Primers for ChIP-QPCR in this paper.**

|                     |         |                            |
|---------------------|---------|----------------------------|
| <i>Gapdh</i> -ChIP  | Forward | CCTTCATTGACCTCAACTACA      |
|                     | Reverse | TAGACTCCACGACATACTCA       |
| <i>Sox2</i> -ChIP   | Forward | TTTATTTCAGTTCCCAGTCCAA     |
|                     | Reverse | TTATTCCTATGTGTGAGCAAGA     |
| <i>Oct4</i> -ChIP   | Forward | ATACTTGAAGTGTGGTGGAG       |
|                     | Reverse | CTATCATGCACCTTTGTTAT       |
| <i>Nanog</i> -ChIP  | Forward | AGGTGGGAAGTATCTATGG        |
|                     | Reverse | CGGCTATTCTATTCAGTGG        |
| <i>Setbp1</i> -ChIP | Forward | ATGTCCCAAAGCCAACAA         |
|                     | Reverse | TCATCCCACCTGACCACC         |
| <i>Colla1</i> -ChIP | Forward | GGGCCTCTAACAAATCTC         |
|                     | Reverse | CAGGAAGCCTGTGACCAG         |
| <i>Col5a1</i> -ChIP | Forward | ACTCCTGTCTCCCTCTGC         |
|                     | Reverse | CGCCTTACTGCTGTCCCT         |
| NC-ChIP             | Forward | AGCATGTGTTCTTCTTACCA       |
|                     | Reverse | GTTAGTTCATATTATTGTTCCACCTA |
| <i>Dppa3</i> -ChIP  | Forward | AATCAAGTAGGGAAAGAAAGGA     |
|                     | Reverse | AAGGCACAGTTACACTCTTAT      |
| <i>Dppa5</i> -ChIP  | Forward | GCGATAGCCCAAAGAAGT         |
|                     | Reverse | ACAGAGATTGAAGCAGACAT       |
| <i>Mixl</i> -ChIP   | Forward | GAATAATCGCTTCCGCTGAC       |
|                     | Reverse | AGAGGGGGTTCTGTCCAAGT       |
| <i>Tert</i> -ChIP   | Forward | ACTTTGGTTGCCCAATGC         |
|                     | Reverse | AAGGAAAGGTCGGCAGGT         |
| <i>Chd1</i> -ChIP   | Forward | CCATGTTAAATGTCATTTA        |
|                     | Reverse | TGGAGTTACAAAGGACTTTA       |

|                     |         |                       |
|---------------------|---------|-----------------------|
| <i>Lefty</i> -ChIP  | Forward | GTCCAGACAGGCTTTTGTGT  |
|                     | Reverse | GTCTGCGGAGGAATGGTA    |
| <i>Fbxo15</i> -ChIP | Forward | GCCCTTAGTTCCCAGATG    |
|                     | Reverse | CTCACCTTACAAGTCCTCAA  |
| O1-ChIP             | Forward | CTCTCGTCCTAGCCCTTCCT  |
|                     | Reverse | CCTCCACTCTGTCATGCTCA  |
| O2-ChIP             | Forward | CTGACCCTAGCCAACAGCTC  |
|                     | Reverse | TGCTCCTACACCATGCTCTG  |
| O3-ChIP             | Forward | CTTAGTGTCTTTCCGCCAGC  |
|                     | Reverse | TCCCCTCACACAAGACTTCC  |
| O4-ChIP             | Forward | GCACTTCTCTGGGGTCTCTG  |
|                     | Reverse | TGAACCCAGTATTTTCAAGCC |
| O5-ChIP             | Forward | CTGTAAGGACAGGCCGAGAG  |
|                     | Reverse | CAGGAGGCCTTCATTTTCAA  |
| O6-ChIP             | Forward | CACGAGTGGAAGCAACTCA   |
|                     | Reverse | TTGGTTCCACCTTCTCCAAC  |
| N1-ChIP             | Forward | ATCGCCTTGAGCCGTTGG    |
|                     | Reverse | CGAGGGAAGGGATTTCTG    |
| N2-ChIP             | Forward | ATGGTGGCTGTGGTGGC     |
|                     | Reverse | GGTTGGTGGTGTGTTGTTGA  |
| N3-ChIP             | Forward | GGCAGTGGAAGAAGGGAA    |
|                     | Reverse | AGCCACCATACTACTGTCTC  |
